# Supplementary material
Source: Springer Nature journal article supplement (http://www.springermedizin.de/resource/supplementary/13023_2009_165_MOESM3_ESM.pdf/9641808)

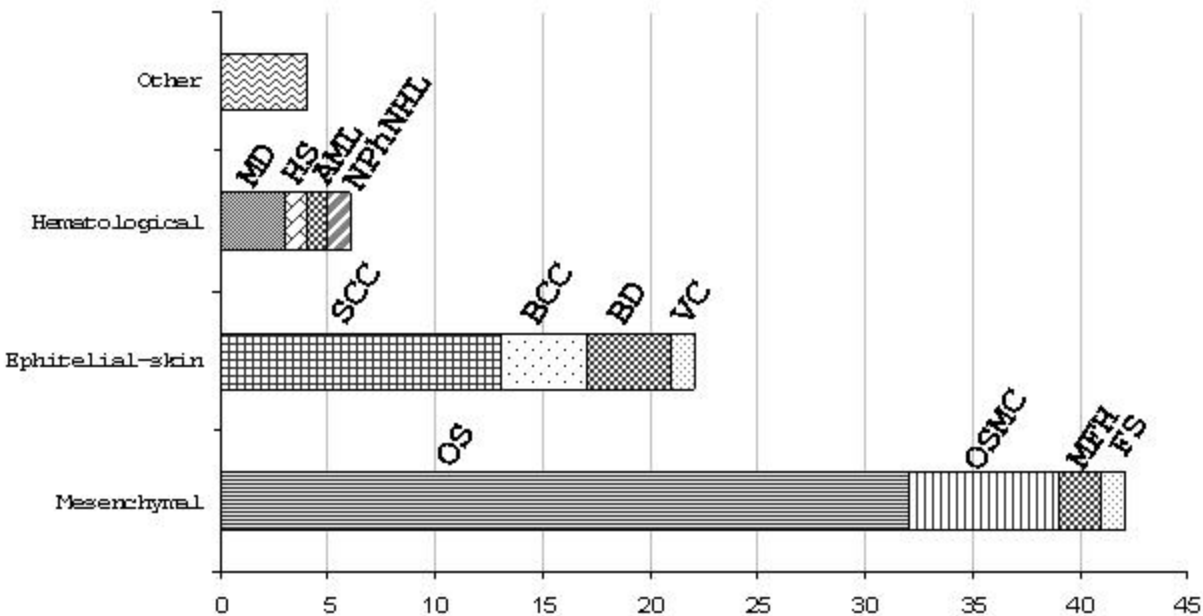

Supplement: MOESM3 [file 9641808]
